# Supplementary material
Source: PubMed Central journal article supplement (PMC3580134)
Supplement: 40265_2012_69050549_MOESM1_ESM.pdf [file 40265_2012_69050549_MOESM1_ESM.pdf]

# **Efficacy and Tolerability of Budesonide/Formoterol in One Hydrofluoroalkane Pressurized Metered-Dose Inhaler in Patients with Chronic Obstructive Pulmonary Disease**

## **Results from a 1-Year Randomized Controlled Clinical Trial**

*Stephen I. Rennard,<sup>1</sup> Donald P. Tashkin,<sup>2</sup> Jennifer McElhattan,<sup>3</sup> Mitchell Goldman,<sup>3</sup> Sulabha Ramachandran,<sup>3</sup> Ubaldo J. Martin,<sup>3</sup> and Philip E. Silkoff<sup>4</sup>*

1 Pulmonary Critical Care, Allergy and Sleep Medicine, University of Nebraska Medical Center, Omaha, Nebraska, USA

2 Division of Pulmonary and Critical Care Medicine, University of California, Los Angeles, California, USA

3 AstraZeneca LP, Wilmington, Delaware, USA

4 Formerly AstraZeneca LP, Wilmington, Delaware, USA

---

## **Supplementary Material**

This supplementary material contains the tables and figures referred to in the full version of this article, which can be found at <http://drugs.adisonline.com>.

## ONLINE SUPPLEMENT TABLES

**Table SI.** AEs Considered by the investigator to be related to study medication reported by  $\geq 3$  patients

| Variable                             | BUD/FM pMDI                          | BUD/FM pMDI                          | FM DPI                           | Placebo   |
|--------------------------------------|--------------------------------------|--------------------------------------|----------------------------------|-----------|
|                                      | 320/9 $\mu\text{g}$ bid<br>(n = 494) | 160/9 $\mu\text{g}$ bid<br>(n = 494) | 9 $\mu\text{g}$ bid<br>(n = 495) |           |
| Mean exposure (days),<br>SD          | 305 (115)                            | 299 (118)                            | 289 (127)                        | 270 (139) |
| AE, n (%)                            |                                      |                                      |                                  |           |
| $\geq 1$ AE                          | 63 (12.8)                            | 51 (10.3)                            | 42 (8.5)                         | 30 (6.2)  |
| Oral candidiasis                     | 22 (4.5)                             | 13 (2.6)                             | 0                                | 6 (1.2)   |
| COPD                                 | 5 (1.0)                              | 12 (2.4)                             | 12 (2.4)                         | 10 (2.1)  |
| Dysphonia                            | 13 (2.6)                             | 5 (1.0)                              | 1 (0.2)                          | 0         |
| Muscle spasms                        | 5 (1.0)                              | 4 (0.8)                              | 1 (0.2)                          | 2 (0.4)   |
| Dyspnoea                             | 1 (0.2)                              | 3 (0.6)                              | 3 (0.6)                          | 3 (0.6)   |
| Ventricular<br>extrasystoles         | 3 (0.6)                              | 3 (0.6)                              | 1 (0.2)                          | 0         |
| Bronchitis                           | 3 (0.6)                              | 1 (0.2)                              | 2 (0.4)                          | 0         |
| Cough                                | 2 (0.4)                              | 1 (0.2)                              | 2 (0.4)                          | 0         |
| Insomnia                             | 0                                    | 2 (0.4)                              | 0                                | 3 (0.6)   |
| Pharyngolaryngeal pain               | 1 (0.2)                              | 1 (0.2)                              | 2 (0.4)                          | 1 (0.2)   |
| Atrial fibrillation                  | 1 (0.2)                              | 1 (0.2)                              | 2 (0.4)                          | 0         |
| Cataract                             | 0                                    | 2 (0.4)                              | 0                                | 1 (0.2)   |
| Dizziness                            | 0                                    | 2 (0.4)                              | 1 (0.2)                          | 0         |
| Headache                             | 1 (0.2)                              | 1 (0.2)                              | 0                                | 1 (0.2)   |
| Laryngitis                           | 2 (0.4)                              | 1 (0.2)                              | 0                                | 0         |
| Lower respiratory tract<br>infection | 0                                    | 0                                    | 2 (0.4)                          | 1 (0.2)   |
| Tremor                               | 3 (0.6)                              | 0                                    | 0                                | 0         |
| Ventricular tachycardia              | 2 (0.4)                              | 1 (0.2)                              | 0                                | 0         |

**AE** = adverse event; **bid** = twice daily; **BUD** = budesonide; **COPD** = chronic obstructive pulmonary disease; **DPI** = dry powder inhaler; **FM** = formoterol; **pMDI** = pressurized metered-dose inhaler.

**Table SII.** Pneumonia-related AEs and AEs potentially related to lung infections

| Variable                                                            | BUD/FM                            |                                          |                                 |                      |
|---------------------------------------------------------------------|-----------------------------------|------------------------------------------|---------------------------------|----------------------|
|                                                                     | pMDI<br>320/9 µg bid<br>(n = 494) | BUD/FM pMDI<br>160/9 µg bid<br>(n = 494) | FM DPI<br>9 µg bid<br>(n = 495) | Placebo<br>(n = 481) |
| Mean exposure (days), SD                                            | 305 (115)                         | 299 (118)                                | 289 (127)                       | 270 (139)            |
| Pneumonia-related (total),<br>n (%)                                 | 20 (4.0)                          | 17 (3.4)                                 | 17 (3.4)                        | 24 (5.0)             |
| Pneumonia                                                           | 15 (3.0)                          | 15 (3.0)                                 | 17 (3.4)                        | 23 (4.8)             |
| Bronchopneumonia                                                    | 2 (0.4)                           | 1 (0.2)                                  | 0                               | 1 (0.2)              |
| Lobar pneumonia                                                     | 2 (0.4)                           | 0                                        | 0                               | 0                    |
| Pneumonia<br>staphylococcal                                         | 1 (0.2)                           | 1 (0.2)                                  | 0                               | 0                    |
| Potential lung infections<br>other than pneumonia<br>(total), n (%) | 40 (8.1)                          | 34 (6.9)                                 | 35 (7.1)                        | 30 (6.2)             |
| Bronchitis                                                          | 24 (4.9)                          | 22 (4.5)                                 | 24 (4.8)                        | 18 (3.7)             |
| Lower respiratory tract<br>infection (viral)                        | 6 (1.2)                           | 7 (1.4)                                  | 5 (1.0)                         | 3 (0.6)              |
| Lower respiratory tract<br>infection (bacterial)                    | 7 (1.4)                           | 1 (0.2)                                  | 3 (0.6)                         | 5 (1.0)              |
| Bronchitis (bacterial)                                              | 1 (0.2)                           | 1 (0.2)                                  | 3 (0.6)                         | 2 (0.4)              |
| Obstructive chronic<br>bronchitis with acute<br>exacerbation        | 1 (0.2)                           | 1 (0.2)                                  | 1 (0.2)                         | 1 (0.2)              |
| Bronchitis (chronic)                                                | 1 (0.2)                           | 0                                        | 1 (0.2)                         | 1 (0.2)              |
| Lower respiratory tract<br>infection                                | 1 (0.2)                           | 1 (0.2)                                  | 1 (0.2)                         | 0                    |
| Sinobronchitis                                                      | 0                                 | 1 (0.2)                                  | 0                               | 1 (0.2)              |
| Tracheobronchitis                                                   | 0                                 | 2 (0.4)                                  | 0                               | 0                    |

**AE** = adverse event; **bid** = twice daily; **BUD** = budesonide; **DPI** = dry powder inhaler; **FM** = formoterol; **pMDI** = pressurized metered-dose inhaler; **SD** = standard deviation.

**Table SIII.** Discontinuations due to adverse events

| Variable                                          | BUD/FM                            | BUD/FM                            | FM DPI                | Placebo   |
|---------------------------------------------------|-----------------------------------|-----------------------------------|-----------------------|-----------|
|                                                   | pMDI<br>320/9 µg bid<br>(n = 494) | pMDI<br>160/9 µg bid<br>(n = 494) | 9 µg bid<br>(n = 495) |           |
| Mean exposure (days),<br>SD                       | 305 (115)                         | 299 (118)                         | 289 (127)             | 270 (139) |
| DAE, n (%)                                        |                                   |                                   |                       |           |
| Patients with any DAE                             | 56 (11.3)                         | 61 (12.3)                         | 61 (12.3)             | 60 (12.5) |
| COPD                                              | 20 (4.0)                          | 30 (6.1)                          | 36 (7.3)              | 29 (6.0)  |
| Dyspnoea                                          | 4 (0.8)                           | 4 (0.8)                           | 3 (0.6)               | 7 (1.5)   |
| Pneumonia                                         | 1 (0.2)                           | 0                                 | 1 (0.2)               | 6 (1.2)   |
| Bronchitis                                        | 1 (0.2)                           | 1 (0.2)                           | 2 (0.4)               | 3 (0.6)   |
| Oral candidiasis                                  | 2 (0.4)                           | 3 (0.6)                           | 0                     | 0         |
| Ventricular<br>extrasystoles                      | 1 (0.2)                           | 3 (0.6)                           | 1 (0.2)               | 0         |
| Bacterial upper<br>respiratory tract<br>infection | 1 (0.2)                           | 1 (0.2)                           | 0                     | 2 (0.4)   |
| Cough                                             | 0                                 | 1 (0.2)                           | 1 (0.2)               | 1 (0.2)   |
| Viral lower<br>respiratory tract<br>infection     | 1 (0.2)                           | 1 (0.2)                           | 1 (0.2)               | 0         |
| Muscle spasms                                     | 3 (0.6)                           | 0                                 | 0                     | 0         |
| Myocardial<br>infarction                          | 0                                 | 3 (0.6)                           | 0                     | 0         |
| Ventricular<br>tachycardia                        | 2 (0.4)                           | 1 (0.2)                           | 0                     | 0         |

**bid** = twice daily; **BUD** = budesonide; **COPD** = chronic obstructive pulmonary disease; **DAE** = discontinuation due to adverse event; **DPI** = dry powder inhaler; **FM** = formoterol; **pMDI** = pressurized metered-dose inhaler; **SD** = standard deviation.

**Table SIV.** Incidence of non-fatal SAEs reported by  $\geq 3$  patients

| Variable                       | BUD/FM pMDI                          | BUD/FM pMDI                          | FM DPI                           | Placebo   |
|--------------------------------|--------------------------------------|--------------------------------------|----------------------------------|-----------|
|                                | 320/9 $\mu\text{g}$ bid<br>(n = 494) | 160/9 $\mu\text{g}$ bid<br>(n = 494) | 9 $\mu\text{g}$ bid<br>(n = 495) | (n = 481) |
| Mean exposure<br>(days), SD    | 305 (115)                            | 299 (118)                            | 289 (127)                        | 270 (139) |
| SAE, n (%)                     |                                      |                                      |                                  |           |
| Patients with any<br>SAE       | 77 (15.6)                            | 67 (13.6)                            | 88 (17.8)                        | 58 (12.1) |
| COPD                           | 35 (7.1)                             | 33 (6.7)                             | 39 (7.9)                         | 27 (5.6)  |
| Pneumonia                      | 5 (1.0)                              | 5 (1.0)                              | 8 (1.6)                          | 12 (2.5)  |
| Atrial fibrillation            | 1 (0.2)                              | 5 (1.0)                              | 3 (0.6)                          | 0         |
| Angina pectoris                | 1 (0.2)                              | 0                                    | 3 (0.6)                          | 1 (0.2)   |
| Bronchitis                     | 0                                    | 3 (0.6)                              | 2 (0.4)                          | 0         |
| Coronary artery<br>disease     | 1 (0.2)                              | 1 (0.2)                              | 2 (0.4)                          | 1 (0.2)   |
| Acute myocardial<br>infarction | 1 (0.2)                              | 1 (0.2)                              | 2 (0.4)                          | 0         |
| Cardiac failure                | 1 (0.2)                              | 0                                    | 2 (0.4)                          | 1 (0.2)   |
| Cholelithiasis                 | 0                                    | 0                                    | 2 (0.4)                          | 2 (0.4)   |
| Myocardial<br>infarction       | 0                                    | 3 (0.6)                              | 0                                | 1 (0.2)   |
| Abdominal hernia               | 1 (0.2)                              | 1 (0.2)                              | 1 (0.2)                          | 0         |
| Aortic aneurysm                | 0                                    | 1 (0.2)                              | 2 (0.4)                          | 0         |



|                               |         |         |         |         |
|-------------------------------|---------|---------|---------|---------|
| Bladder cancer                | 1 (0.2) | 0       | 2 (0.4) | 0       |
| Cardiac failure<br>congestive | 1 (0.2) | 2 (0.4) | 0       | 0       |
| Cor pulmonale                 | 1 (0.2) | 0       | 1 (0.2) | 1 (0.2) |
| Non-cardiac chest<br>pain     | 1 (0.2) | 0       | 2 (0.4) | 0       |
| Pulmonary embolism            | 1 (0.2) | 1 (0.2) | 0       | 1 (0.2) |
| Respiratory failure           | 0       | 1 (0.2) | 1 (0.2) | 1 (0.2) |

---

**bid** = twice daily; **BUD** = budesonide; **COPD** = chronic obstructive pulmonary disease; **DPI** = dry powder inhaler; **FM** = formoterol; **pMDI** = pressurized metered-dose inhaler; **SAE** = serious adverse event; **SD** = standard deviation.

**Table SV.** Geometric means 24-hour urinary cortisol (nmol/24 hours) at 6 months and end of treatment

|                         | BUD/FM pMDI<br>320/9 µg bid | BUD/FM pMDI<br>160/9 µg bid | FM DPI<br>9 µg bid | Placebo |
|-------------------------|-----------------------------|-----------------------------|--------------------|---------|
| <b>6 Months</b>         |                             |                             |                    |         |
| No. of patients         | 48                          | 44                          | 38                 | 45      |
| Baseline                | 48.68                       | 43.74                       | 47.72              | 36.58   |
| Mean                    | 33.54*                      | 41.62                       | 50.55              | 45.75   |
| <b>End of treatment</b> |                             |                             |                    |         |
| No. of patients         | 48                          | 47                          | 38                 | 45      |
| Baseline                | 48.68                       | 43.73                       | 47.72              | 36.58   |
| Mean                    | 34.32†                      | 40.84                       | 53.20              | 46.11   |

\* p < 0.05 vs placebo, † p < 0.05 vs FM.

**bid** = twice daily; **BUD** = budesonide; **DPI** = dry powder inhaler; **FM** = formoterol; **pMDI** = pressurized metered-dose inhaler.

**Table SVI.** Number (%) of patients with outlier assessments during treatment for QTc

| Assessment                    | BUD/FM pMDI  | BUD/FM pMDI  | FM DPI    | Placebo   |
|-------------------------------|--------------|--------------|-----------|-----------|
|                               | 320/9 µg bid | 160/9 µg bid | 9 µg bid  |           |
| <b>Bazett's</b>               |              |              |           |           |
| QTc interval $\geq 450$ msec* | 72 (14.8)    | 83 (17.0)    | 59 (12.2) | 66 (14.0) |
| QTc interval $\geq 500$ msec  | 4 (0.8)      | 5 (1.0)      | 5 (1.0)   | 6 (1.3)   |
| QTc change $\geq 60$ msec     | 8 (1.6)      | 12 (2.5)     | 7 (1.4)   | 7 (1.5)   |
| <b>Fridericia's</b>           |              |              |           |           |
| QTc interval $\geq 450$ msec* | 29 (6.0)     | 27 (5.5)     | 36 (7.4)  | 27 (5.7)  |
| QTc interval $\geq 500$ msec  | 1 (0.2)      | 2 (0.4)      | 2 (0.4)   | 4 (0.8)   |
| QTc change $\geq 60$ msec     | 5 (1.0)      | 6 (1.2)      | 5 (1.0)   | 6 (1.3)   |

\*For patients with baseline  $< 450$  msec.

**bid** = twice daily; **BUD** = budesonide; **DPI** = dry powder inhaler; **FM** = formoterol; **pMDI** = pressurized metered-dose inhaler.

**Table SVII.** Total lumbar spine and total hip BMD (g/cm<sup>2</sup>): mean (SD) changes from baseline to end of treatment

| Variable               | BUD/FM pMDI                 | BUD/FM pMDI  | FM DPI      | Placebo      |
|------------------------|-----------------------------|--------------|-------------|--------------|
|                        | 320/9 µg bid                | 160/9 µg bid | 9 µg bid    |              |
| Total lumbar spine BMD |                             |              |             |              |
| Baseline               |                             |              |             |              |
| No. of patients        | 87                          | 86           | 81          | 66           |
| Mean (SD)              | 1.01 (0.19)                 | 0.99 (0.20)  | 0.96 (0.16) | 0.97 (0.18)  |
| Change from baseline   |                             |              |             |              |
| No. of patients        | 83                          | 83           | 79          | 66           |
| Mean (SD)              | -0.01 (0.04) <sup>*†‡</sup> | 0.01 (0.04)  | 0.00 (0.04) | 0.01 (0.04)  |
| Total hip BMD          |                             |              |             |              |
| Baseline               |                             |              |             |              |
| No. of patients        | 86                          | 86           | 80          | 66           |
| Mean (SD)              | 0.87 (0.15)                 | 0.86 (0.18)  | 0.85 (0.16) | 0.87 (0.15)  |
| Change from baseline   |                             |              |             |              |
| No. of patients        | 84                          | 82           | 76          | 65           |
| Mean (SD)              | -0.01 (0.02) <sup>†</sup>   | 0.00 (0.02)  | 0.00 (0.02) | -0.01 (0.02) |

\* p < 0.05 vs placebo, † p < 0.05 vs FM, ‡p < 0.01 vs BUD/FM 160/9 µg.

**bid** = twice daily; **BMD** = bone mineral density; **BUD** = budesonide; **DPI** = dry powder inhaler;

**FM** = formoterol; **pMDI** = pressurized metered-dose inhaler; **SD** = standard deviation.

**Table SVIII.** Intraocular pressure and lenticular opacity: mean (SD) changes from baseline to end of treatment

| Variable                                         | BUD/FM pMDI  | BUD/FM pMDI  | FM DPI     | Placebo    |
|--------------------------------------------------|--------------|--------------|------------|------------|
|                                                  | 320/9 µg bid | 160/9 µg bid | 9 µg bid   |            |
| Intraocular pressure (mmHg)                      |              |              |            |            |
| No. of patients                                  | 122          | 105          | 118        | 116        |
| Baseline                                         | 15.5 (3.3)   | 15.3 (2.8)   | 15.4 (2.8) | 15.8 (3.3) |
| Change from baseline                             | 0.6 (4.0)    | 0.9 (3.2)    | 0.7 (3.0)  | 0.6 (3.1)  |
| Lenticular opacity score (posterior subcapsular) |              |              |            |            |
| No. of patients                                  | 119          | 98           | 116        | 112        |
| Baseline                                         | 0.4 (0.7)    | 0.5 (0.9)    | 0.5 (0.8)  | 0.5 (0.8)  |
| Change from baseline                             | 0.2 (0.5)*   | 0.1 (0.2)    | 0.1 (0.4)  | 0.1 (0.5)  |

\*p = 0.022 vs BUD/FM 160/9 µg.

**bid** = twice daily; **BUD** = budesonide; **DPI** = dry powder inhaler; **FM** = formoterol; **pMDI** = pressurized metered-dose inhaler; **SD** = standard deviation.

**Figure S1**

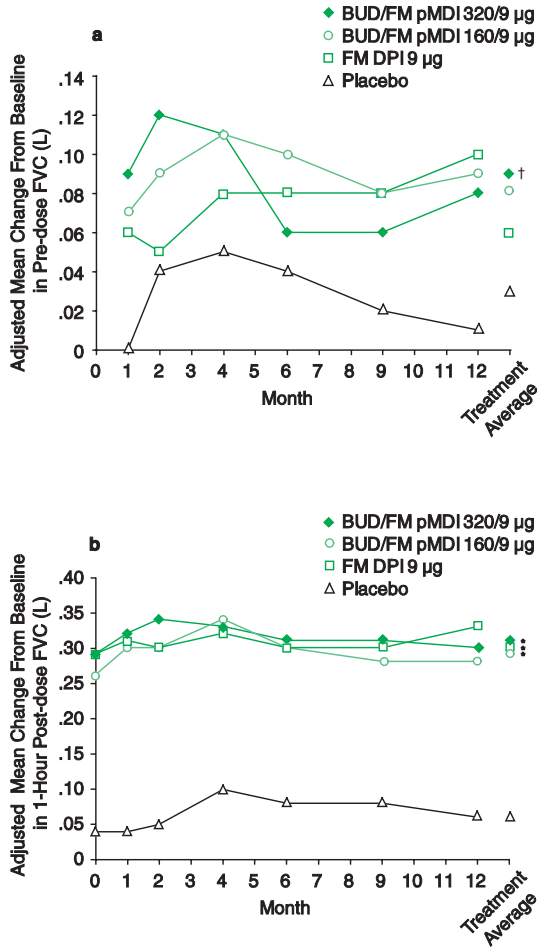

Least squares mean change from baseline by study visit over the randomized treatment period in

A) pre-dose FVC and B) 1-hour post-dose FVC.

**FVC** = forced vital capacity; **BUD** = budesonide; **FM** = formoterol. †  $p < 0.05$  vs placebo, \*  $p \leq 0.001$  vs placebo.

**Figure S2**

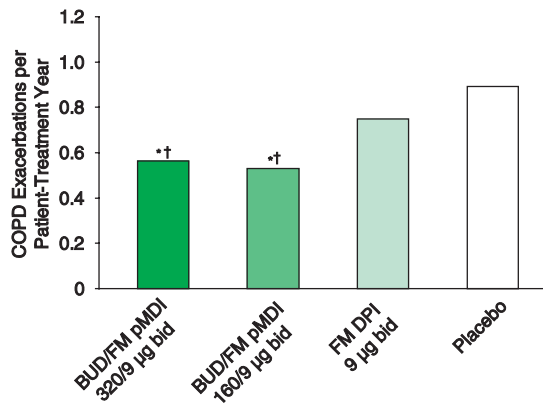

COPD exacerbations as the total rate per patient-treatment year.

**COPD** = chronic obstructive pulmonary disease; **BUD** = budesonide; **FM** = formoterol; **pMDI** = pressurized metered-dose inhaler; **bid** = twice daily; **DPI** = dry powder inhaler. \*  $p < 0.01$  vs formoterol, †  $p < 0.001$  vs placebo.

**Figure S3**

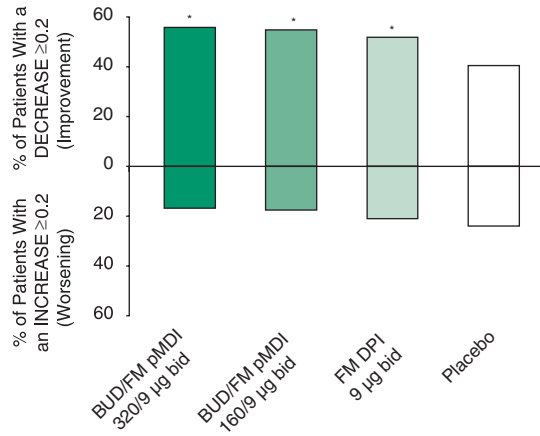

Percentage of patients with categorical changes of  $\geq 0.2$  from baseline for dyspnoea over the randomized treatment period.

**BUD** = budesonide; **FM** = formoterol; **pMDI** = pressurized metered-dose inhaler; **bid** = twice daily; **DPI** = dry powder inhaler. \*  $p < 0.001$  vs placebo.
